# Supplementary material for: Applying MALDI-TOF MS to resolve morphologic and genetic similarities between two Dermacentor tick species of public health importance
Source: PubMed Central journal article supplement (PMC11350171; doi:10.1038/s41598-024-69768-8), 2024-08-27
Supplement: 41598_2024_69768_MOESM2_ESM.pdf [file 41598_2024_69768_MOESM2_ESM.pdf]

Supplementary Information

Tables S1 and S2

**APPLYING MALDI-TOF MS TO RESOLVE MORPHOLOGIC AND GENETIC SIMILARITIES BETWEEN TWO  
*DERMACENTOR* TICK SPECIES OF PUBLIC HEALTH IMPORTANCE**

Maria F. B. M. Galletti<sup>1\*</sup>, Joy A. Hecht<sup>1</sup>, John R. McQuiston<sup>2</sup>, Jarrett Gartin<sup>2</sup>, Jake Cochran<sup>2</sup>, Bessie H. Blocher<sup>1</sup>, Bryan N. Ayres<sup>1</sup>, Michelle E. J. Allerdice<sup>1</sup>, Lorenza Beati<sup>3</sup>, William L. Nicholson<sup>1</sup>, Alyssa N. Snellgrove<sup>1</sup>, Christopher D. Paddock<sup>1</sup>, US Tick MALDI-TOF consortium

<sup>1</sup> Rickettsial Zoonoses Branch, Division of Vector-Borne Diseases, National Center for Emerging and Zoonotic Infectious Diseases, Centers for Disease Control and Prevention, Atlanta, USA.

<sup>2</sup> Division of High-Consequence Pathogens and Pathology, National Center for Emerging and Zoonotic Infectious Diseases, Centers for Disease Control and Prevention, Atlanta, USA.

<sup>3</sup> United States National Tick Collection, Institute for Coastal Plain Science, Georgia Southern University, Statesboro, USA.

\*Address correspondence to Maria F. B. M. Galletti, [myu8@cdc.gov](mailto:myu8@cdc.gov)

Table S1. Oligonucleotide used in the pathogen screening and tick gene sequencing analyzes.

| TARGET ORGANISM                                                                                                                                                                                                                                                                                                                                               | GENE TARGET    | OLIGONUCLEOTIDE NAME | SEQUENCE 5'-3'                   | PCR TYPE                 | AMPLICON SIZE (bp) | PRIMER DESIGN REFERENCES |
|---------------------------------------------------------------------------------------------------------------------------------------------------------------------------------------------------------------------------------------------------------------------------------------------------------------------------------------------------------------|----------------|----------------------|----------------------------------|--------------------------|--------------------|--------------------------|
| Tick                                                                                                                                                                                                                                                                                                                                                          | 12S rDNA       | T1B                  | AAACTAGGATTAGATACCT              | PCR                      | 335                | 55                       |
|                                                                                                                                                                                                                                                                                                                                                               |                | T2A                  | AATGAGAGCGACGGGCGATGT            |                          |                    |                          |
| Tick                                                                                                                                                                                                                                                                                                                                                          | ITS2*          | DITS2_F1             | GTTTGGCAGAGAGTCGGAAG             | PCR                      | 365                | 72                       |
|                                                                                                                                                                                                                                                                                                                                                               |                | DITS2_R1             | CTGGAGTGGCCCAGTCTTT              |                          |                    |                          |
| Genus <i>Rickettsia</i>                                                                                                                                                                                                                                                                                                                                       | 23S rRNA (rrl) | PanR8_F              | AGCTTGCTTTTGGATCATTGG            | real-time PCR            | 111                | 68                       |
|                                                                                                                                                                                                                                                                                                                                                               |                | PanR8_R              | TTCTTGCCTTTTCATACATCTAGT         |                          |                    |                          |
|                                                                                                                                                                                                                                                                                                                                                               |                | PanR8_P              | CCTGCTTCTATTTGTCTTGCAGTAACACGCCA |                          |                    |                          |
| <i>Rickettsia akari</i> , <i>R. amblyommatis</i> , <i>R. australis</i> , <i>R. canadensis</i> , <i>R. conorii</i> , <i>R. felis</i> , <i>R. honei</i> , <i>R. massiliae</i> , <i>R. montanensis</i> , <i>R. parkeri</i> , <i>R. rhipicephali</i> , <i>R. sibirica</i> , <i>R. slovaca</i> , <i>R. rickettsii</i> , <i>R. prowazekii</i> , and <i>R. typhi</i> | <i>ompA</i> *  | RR190-70             | ATGGCGAATATTTCTCCAAAA            | Primary stage Nested PCR | 632                | 63,64                    |
|                                                                                                                                                                                                                                                                                                                                                               |                | RR190-701            | GTTCCGTTAATFGCAGCATCT            |                          |                    |                          |
|                                                                                                                                                                                                                                                                                                                                                               |                | RR190-70             | ATGGCGAATATTTCTCCAAAA            | Semi-nested stage PCR    | 532                |                          |
|                                                                                                                                                                                                                                                                                                                                                               |                | RR190-602            | AGTGCAGATTGCTCCCCCT              |                          |                    |                          |
| Genera <i>Anaplasma</i> , <i>Ehrlichia</i> , <i>Neoehrlichia</i> , <i>Neorickettsia</i> , and <i>Wolbachia</i>                                                                                                                                                                                                                                                | 16S            | ECHSYBR-F            | AACACATGCAAGTCGAACGG             | real-time PCR            | 146 to 154         | 67                       |
|                                                                                                                                                                                                                                                                                                                                                               |                | ECHSYBR-R            | CCCCCGCAGGGATTATACA              |                          |                    |                          |
| <i>Rickettsia bellii</i>                                                                                                                                                                                                                                                                                                                                      | <i>gltA</i> *  | RBELLIF              | ATCCTGATTTGCTGAATTTTT            | real-time PCR            | 338                | 69                       |
|                                                                                                                                                                                                                                                                                                                                                               |                | RBELLIR              | TGCAATACCAGTACTGACG              |                          |                    |                          |
|                                                                                                                                                                                                                                                                                                                                                               |                | RBELLII_P3_CR610     | ATGATGTTTGCCACACCTTGTGAAAA       |                          |                    |                          |
|                                                                                                                                                                                                                                                                                                                                                               | rrs            | Out2F                | GATAGCGGAATTCCTAGTGTAGAGGTG      | PCR                      | 599                | 6,71                     |
|                                                                                                                                                                                                                                                                                                                                                               |                | 317Pan               | AAAGGAGGTAATCCAGC                |                          |                    |                          |
|                                                                                                                                                                                                                                                                                                                                                               | <i>gltA</i> *  | Abov_gltA2F          | CGGAAATTACTTTTATAGATGG           | PCR                      | 826                | 6                        |
|                                                                                                                                                                                                                                                                                                                                                               |                | Abov_gltA2R          | CATACCAYTGAGAAACCCAAC            |                          |                    |                          |
| <i>Anaplasma bovis</i> -like                                                                                                                                                                                                                                                                                                                                  | groEL          | HS1-f                | CGTCAGTGGGCTGGTAATGAA            | Primary stage Nested PCR | 1360               | 65, 70                   |
|                                                                                                                                                                                                                                                                                                                                                               |                | HS6-r                | CCWCCWGGTCWACACCTTC              |                          |                    |                          |
|                                                                                                                                                                                                                                                                                                                                                               |                | HS3-f                | ATAGTYATGAAGGAGAGTGAT            | Semi-nested stage PCR    | 1320               | 70                       |
|                                                                                                                                                                                                                                                                                                                                                               |                | HSV-r                | TCAACAGCAGCTCTAGTWG              |                          |                    |                          |

\*ITS2: internal transcribed spacer 2 region; *ompA*: outer membrane protein A; *gltA*: citrate synthase.

Table S2. Accession numbers of the nuclear ITS2 and mitochondrial 12S ribosomal sequences deposited in NCBI.

| Target                           | Organism                      | Accession number | Sample                                | Geographical origin (USA state) |
|----------------------------------|-------------------------------|------------------|---------------------------------------|---------------------------------|
| internal transcribed spacer 2    | <i>Dermacentor variabilis</i> | OR757077         | <i>Dermacentor variabilis</i> TN 114  | TN                              |
| internal transcribed spacer 2    | <i>Dermacentor variabilis</i> | OR757078         | <i>Dermacentor variabilis</i> OH 731  | OH                              |
| internal transcribed spacer 2    | <i>Dermacentor variabilis</i> | OR757079         | <i>Dermacentor variabilis</i> DE 2383 | DE                              |
| internal transcribed spacer 2    | <i>Dermacentor variabilis</i> | OR757080         | <i>Dermacentor variabilis</i> GA 2606 | GA                              |
| internal transcribed spacer 2    | <i>Dermacentor variabilis</i> | OR757081         | <i>Dermacentor variabilis</i> NJ 2292 | NJ                              |
| internal transcribed spacer 2    | <i>Dermacentor variabilis</i> | OR757082         | <i>Dermacentor variabilis</i> IA 3267 | IA                              |
| internal transcribed spacer 2    | <i>Dermacentor variabilis</i> | OR757083         | <i>Dermacentor variabilis</i> SC 940  | SC                              |
| internal transcribed spacer 2    | <i>Dermacentor variabilis</i> | OR757084         | <i>Dermacentor variabilis</i> WI 1532 | WI                              |
| internal transcribed spacer 2    | <i>Dermacentor variabilis</i> | OR757085         | <i>Dermacentor variabilis</i> MI 2368 | MI                              |
| internal transcribed spacer 2    | <i>Dermacentor variabilis</i> | OR757086         | <i>Dermacentor variabilis</i> ND 1353 | ND                              |
| internal transcribed spacer 2    | <i>Dermacentor variabilis</i> | OR757087         | <i>Dermacentor variabilis</i> DE 2399 | DE                              |
| internal transcribed spacer 2    | <i>Dermacentor variabilis</i> | OR757088         | <i>Dermacentor variabilis</i> NE 3145 | NE                              |
| internal transcribed spacer 2    | <i>Dermacentor variabilis</i> | OR757089         | <i>Dermacentor variabilis</i> GA 2601 | GA                              |
| internal transcribed spacer 2    | <i>Dermacentor variabilis</i> | OR757090         | <i>Dermacentor variabilis</i> NY 1721 | NY                              |
| internal transcribed spacer 2    | <i>Dermacentor variabilis</i> | OR757091         | <i>Dermacentor variabilis</i> NJ 2291 | NJ                              |
| internal transcribed spacer 2    | <i>Dermacentor variabilis</i> | OR757092         | <i>Dermacentor variabilis</i> TN 115  | TN                              |
| internal transcribed spacer 2    | <i>Dermacentor variabilis</i> | OR757093         | <i>Dermacentor variabilis</i> NY 1719 | NY                              |
| internal transcribed spacer 2    | <i>Dermacentor variabilis</i> | OR757094         | <i>Dermacentor variabilis</i> CT 2063 | CT                              |
| internal transcribed spacer 2    | <i>Dermacentor variabilis</i> | OR757095         | <i>Dermacentor variabilis</i> OH 729  | OH                              |
| internal transcribed spacer 2    | <i>Dermacentor variabilis</i> | OR757096         | <i>Dermacentor variabilis</i> WI 1531 | WI                              |
| internal transcribed spacer 2    | <i>Dermacentor variabilis</i> | OR757097         | <i>Dermacentor variabilis</i> IA 3280 | IA                              |
| internal transcribed spacer 2    | <i>Dermacentor variabilis</i> | OR757098         | <i>Dermacentor variabilis</i> OH 741  | OH                              |
| internal transcribed spacer 2    | <i>Dermacentor variabilis</i> | OR757099         | <i>Dermacentor variabilis</i> NE 3136 | NE                              |
| internal transcribed spacer 2    | <i>Dermacentor variabilis</i> | OR757100         | <i>Dermacentor variabilis</i> GA 2604 | GA                              |
| internal transcribed spacer 2    | <i>Dermacentor variabilis</i> | OR757101         | <i>Dermacentor variabilis</i> MI 2369 | MI                              |
| internal transcribed spacer 2    | <i>Dermacentor variabilis</i> | OR757102         | <i>Dermacentor variabilis</i> OH 727  | OH                              |
| internal transcribed spacer 2    | <i>Dermacentor variabilis</i> | OR757103         | <i>Dermacentor variabilis</i> OH 724  | OH                              |
| internal transcribed spacer 2    | <i>Dermacentor variabilis</i> | OR757104         | <i>Dermacentor variabilis</i> SC 924  | SC                              |
| small subunit ribosomal RNA gene | <i>Dermacentor variabilis</i> | OR840660         | <i>Dermacentor variabilis</i> OH 727  | OH                              |
| small subunit ribosomal RNA gene | <i>Dermacentor variabilis</i> | OR840661         | <i>Dermacentor variabilis</i> ND 1353 | ND                              |
| small subunit ribosomal RNA gene | <i>Dermacentor variabilis</i> | OR840662         | <i>Dermacentor variabilis</i> WI 1530 | WI                              |
| small subunit ribosomal RNA gene | <i>Dermacentor variabilis</i> | OR840663         | <i>Dermacentor variabilis</i> MI 2371 | MI                              |
| small subunit ribosomal RNA gene | <i>Dermacentor variabilis</i> | OR840664         | <i>Dermacentor variabilis</i> GA 2606 | GA                              |
| small subunit ribosomal RNA gene | <i>Dermacentor variabilis</i> | OR840665         | <i>Dermacentor variabilis</i> TN 114  | TN                              |
| small subunit ribosomal RNA gene | <i>Dermacentor variabilis</i> | OR840666         | <i>Dermacentor variabilis</i> NY 1719 | NY                              |
| small subunit ribosomal RNA gene | <i>Dermacentor variabilis</i> | OR840667         | <i>Dermacentor variabilis</i> NE 3145 | NE                              |
| small subunit ribosomal RNA gene | <i>Dermacentor variabilis</i> | OR840668         | <i>Dermacentor variabilis</i> SC 928  | SC                              |
| small subunit ribosomal RNA gene | <i>Dermacentor variabilis</i> | OR840669         | <i>Dermacentor variabilis</i> SC 924  | SC                              |
| small subunit ribosomal RNA gene | <i>Dermacentor variabilis</i> | OR840670         | <i>Dermacentor variabilis</i> ND 1356 | ND                              |
| small subunit ribosomal RNA gene | <i>Dermacentor variabilis</i> | OR840671         | <i>Dermacentor variabilis</i> OH 736  | OH                              |

Table S2. continuation.

| Target                           | Organism                      | Accession number | Sample                                | Geographical origin (USA state) |
|----------------------------------|-------------------------------|------------------|---------------------------------------|---------------------------------|
| small subunit ribosomal RNA gene | <i>Dermacentor variabilis</i> | OR840672         | <i>Dermacentor variabilis</i> WI 1529 | WI                              |
| small subunit ribosomal RNA gene | <i>Dermacentor variabilis</i> | OR840673         | <i>Dermacentor variabilis</i> NY 1721 | NY                              |
| small subunit ribosomal RNA gene | <i>Dermacentor variabilis</i> | OR840674         | <i>Dermacentor variabilis</i> NJ 2293 | NJ                              |
| small subunit ribosomal RNA gene | <i>Dermacentor variabilis</i> | OR840675         | <i>Dermacentor variabilis</i> GA 2601 | GA                              |
| small subunit ribosomal RNA gene | <i>Dermacentor variabilis</i> | OR840676         | <i>Dermacentor variabilis</i> SC 943  | SC                              |
| small subunit ribosomal RNA gene | <i>Dermacentor variabilis</i> | OR840677         | <i>Dermacentor variabilis</i> SC 938  | SC                              |
| small subunit ribosomal RNA gene | <i>Dermacentor variabilis</i> | OR840678         | <i>Dermacentor variabilis</i> SC 930  | SC                              |
| small subunit ribosomal RNA gene | <i>Dermacentor variabilis</i> | OR840679         | <i>Dermacentor variabilis</i> NY 1797 | NY                              |
| small subunit ribosomal RNA gene | <i>Dermacentor variabilis</i> | OR840680         | <i>Dermacentor variabilis</i> NJ 2291 | NJ                              |
| small subunit ribosomal RNA gene | <i>Dermacentor variabilis</i> | OR840681         | <i>Dermacentor variabilis</i> DE 2399 | DE                              |
| small subunit ribosomal RNA gene | <i>Dermacentor variabilis</i> | OR840682         | <i>Dermacentor variabilis</i> SC 940  | SC                              |
| small subunit ribosomal RNA gene | <i>Dermacentor variabilis</i> | OR840683         | <i>Dermacentor variabilis</i> CT 2063 | CT                              |
| small subunit ribosomal RNA gene | <i>Dermacentor variabilis</i> | OR840684         | <i>Dermacentor variabilis</i> CT 2065 | CT                              |
| small subunit ribosomal RNA gene | <i>Dermacentor variabilis</i> | OR840685         | <i>Dermacentor variabilis</i> NY 1723 | NY                              |
| small subunit ribosomal RNA gene | <i>Dermacentor variabilis</i> | OR840686         | <i>Dermacentor variabilis</i> CT 2130 | CT                              |
| small subunit ribosomal RNA gene | <i>Dermacentor variabilis</i> | OR840687         | <i>Dermacentor variabilis</i> SC 927  | SC                              |
| small subunit ribosomal RNA gene | <i>Dermacentor variabilis</i> | OR840688         | <i>Dermacentor variabilis</i> NE 3235 | NE                              |
| small subunit ribosomal RNA gene | <i>Dermacentor variabilis</i> | OR840689         | <i>Dermacentor variabilis</i> WI 1531 | WI                              |
| small subunit ribosomal RNA gene | <i>Dermacentor variabilis</i> | OR840690         | <i>Dermacentor variabilis</i> WI 1532 | WI                              |
| small subunit ribosomal RNA gene | <i>Dermacentor variabilis</i> | OR840691         | <i>Dermacentor variabilis</i> GA 2600 | GA                              |
| small subunit ribosomal RNA gene | <i>Dermacentor variabilis</i> | OR840692         | <i>Dermacentor variabilis</i> GA 2605 | GA                              |
| small subunit ribosomal RNA gene | <i>Dermacentor variabilis</i> | OR840693         | <i>Dermacentor variabilis</i> DE 2384 | DE                              |
| internal transcribed spacer 2    | <i>Dermacentor similis</i>    | OR734979         | <i>Dermacentor similis</i> CA 2666    | CA                              |
| internal transcribed spacer 2    | <i>Dermacentor similis</i>    | OR734980         | <i>Dermacentor similis</i> WA 3059    | WA                              |
| internal transcribed spacer 2    | <i>Dermacentor similis</i>    | OR734981         | <i>Dermacentor similis</i> CA 2680    | CA                              |
| internal transcribed spacer 2    | <i>Dermacentor similis</i>    | OR734982         | <i>Dermacentor similis</i> CA 2761    | CA                              |
| internal transcribed spacer 2    | <i>Dermacentor similis</i>    | OR734983         | <i>Dermacentor similis</i> CA 2738    | CA                              |
| internal transcribed spacer 2    | <i>Dermacentor similis</i>    | OR734984         | <i>Dermacentor similis</i> CA 2686    | CA                              |
| small subunit ribosomal RNA gene | <i>Dermacentor similis</i>    | PP085218         | <i>Dermacentor similis</i> CA 2664    | CA                              |
| small subunit ribosomal RNA gene | <i>Dermacentor similis</i>    | PP085219         | <i>Dermacentor similis</i> WA 3065    | WA                              |
| small subunit ribosomal RNA gene | <i>Dermacentor similis</i>    | PP085220         | <i>Dermacentor similis</i> CA 2683    | CA                              |
| small subunit ribosomal RNA gene | <i>Dermacentor similis</i>    | PP085221         | <i>Dermacentor similis</i> WA 3092    | WA                              |
| small subunit ribosomal RNA gene | <i>Dermacentor similis</i>    | PP085222         | <i>Dermacentor similis</i> CA 2686    | CA                              |
| small subunit ribosomal RNA gene | <i>Dermacentor similis</i>    | PP085223         | <i>Dermacentor similis</i> CA 2658    | CA                              |
| small subunit ribosomal RNA gene | <i>Dermacentor similis</i>    | PP085224         | <i>Dermacentor similis</i> CA 2680    | CA                              |
| small subunit ribosomal RNA gene | <i>Dermacentor similis</i>    | PP085225         | <i>Dermacentor similis</i> CA 2663    | CA                              |
| small subunit ribosomal RNA gene | <i>Dermacentor similis</i>    | PP085226         | <i>Dermacentor similis</i> CA 2736    | CA                              |
| small subunit ribosomal RNA gene | <i>Dermacentor similis</i>    | PP085227         | <i>Dermacentor similis</i> CA 2738    | CA                              |
